## Subject Index

### Amphibia

- axolotl
  - morphogenesis of limb blastema – relationship between pattern and form: HOLDER & REYNOLDS 165

### Asialoglycoprotein receptor

- on isolated foetal rat hepatocytes: CONTI DEVIRGILIIS, DINI & RUSSO-CAIA 41

### Autonomous cortical activity

- in mouse eggs controlled by cytoplasmic clock: WAKSMUNDZKA, KRYSIAK, KARASIEWICZ, CZOŁOWSKA & TARKOWSKI 77

### Axolotl

- larvae
  - skin-gland spacing pattern: HOLDER & GLADE 97
- limb blastema
  - relationship between pattern and form: HOLDER & REYNOLDS 165

### Basement membrane

- labelling in living chick embryo during gastrulation: SANDERS 113

### Bile duct cells

- origin of in mouse embryos: SHIOJIRI 25

### Cell adhesion

- in chick segmental plate resulting in meristic pattern: CHENEY & LASH 1

### Cell aggregative behaviour

- of rat vibrissa dermal papilla *in vivo* and *in vitro*: JAHODA & OLIVER 211

### Cell death

- during morphogenesis of digits of duck embryo webbed feet: HURLE & FERNANDEZ-TERAN 201

### Chick

- embryo
  - cell – cell adhesion in segmental plate: CHENEY & LASH 1
  - epithelial induction of osteogenesis in mandibular mesenchyme: VAN EXAN & HALL 225
  - connective tissue differentiation in explanted somites: SWALLA & SOLURSH 243
  - labelling of basement membrane during gastrulation: SANDERS 113

- miniaturized somites: BELLAIRS & VEINI 183

### Chondrogenesis

- in explanted chick somites: SWALLA & SOLURSH 243

### Cleavage

- DNA replication and gene expression in mouse embryos: BOLTON, OADES & JOHNSON 139

### Connective tissue

- differentiation in chick explanted somites: SWALLA & SOLURSH 243

### Cortical activity

- in mouse eggs controlled by a cytoplasmic clock: WAKSMUNDZKA, KRYSIAK, KARASIEWICZ, CZOŁOWSKA & TARKOWSKI 77

### Coupling junctions

- in preimplantation mouse embryos: GOODALL & JOHNSON 53

### Culture

- of explanted chick somites–differentiation of connective tissues: SWALLA & SOLURSH 243
- of rat vibrissa dermal papilla cells: JAHODA & OLIVER 211

### Cytoplasmic clock

- controlling autonomous cortical activity in mouse eggs: WAKSMUNDZKA, KRYSIAK, KARASIEWICZ, CZOŁOWSKA & TARKOWSKI 77

### Deoxyribose nucleic acid (DNA)

- replication in mouse embryos: BOLTON, OADES & JOHNSON 139

### Dermal papilla

- cell aggregative behaviour *in vivo* and *in vitro*: JAHODA & OLIVER 211

### Duck

- embryo
  - interdigital membranes during morphogenesis of webbed feet: HURLE & FERNANDEZ-TERAN 201

### Egg

- mouse
  - autonomous cortical activity controlled by cytoplasmic clock: WAKSMUNDZKA, KRYSIAK, KARASIEWICZ, CZOŁOWSKA & TARKOWSKI 77

- Electron microscope**  
evidence for asialoglycoprotein receptors  
on rat hepatocytes: CONTI DEVIRGILIIS,  
DINI & RUSSO-CAIA 41
- Epithelial induction**  
of osteogenesis in embryonic chick  
mandibular mesenchyme: VAN EXAN &  
HALL 225
- Epithelio-mesenchymal interface**  
in interdigital membranes of webbed feet  
of duck embryo: HURLE & FERNANDEZ-  
TERAN 201
- Fibroblasts**  
of rat skin cultured *in vivo* and *in vitro*:  
JAHODA & OLIVER 211
- Field shape**  
and pattern formation in axolotl blastema:  
HOLDER & REYNOLDS 165
- Gap junctions**  
in preimplantation stages of mouse em-  
bryo: GOODALL & JOHNSON 53
- Gastrula**  
chick  
control of somite segmentation:  
BELLAIRS & VEINI 183
- Gastrulation**  
of chick embryo – labelling of basement  
membrane: SANDERS 113
- Gene expression**  
cleavage and DNA replication in mouse  
embryos: BOLTON, OADES & JOHNSON  
139
- Hepatocytes**  
differentiation into intrahepatic bile duct  
cells: SHIOJIRI 25  
isolated from foetal rats–asialoglyco-  
protein receptors: CONTI DEVIRGILIIS,  
DINI & RUSSO-CAIA 41
- Identified neuron**  
in leech nervous system: KUWADA 125
- Interdigital membrane**  
during morphogenesis of digits of duck em-  
bryo webbed foot: HURLE & FERNANDEZ-  
TERAN 201
- Intrahepatic bile ducts**  
origin of in mouse embryos: SHIOJIRI 25
- Leech**  
motor neuron  
normal and abnormal development:  
KUWADA 125
- Limb blastema**  
of axolotl – relationship between pattern  
and form: HOLDER & REYNOLDS 165
- Limb development**  
of duck embryo: HURLE & FERNANDEZ-  
TERAN 201
- Liver**  
embryonic mouse  
origin of intrahepatic bile duct cells:  
SHIOJIRI 25
- Mandibular mesenchyme**  
epithelial induction of osteogenesis in  
chick embryos: VAN EXAN & HALL 225
- Mesenchyme**  
chick embryonic  
epithelial induction of osteogenesis: VAN  
EXAN & HALL 225
- Midbody**  
presence in preimplantation mouse em-  
bryo, role in communication: GOODALL &  
JOHNSON 53
- Morula**  
mouse  
intercellular couplings: GOODALL & JOHN-  
SON 53
- Motor neuron**  
in leech nervous system: KUWADA 125
- Mouse**  
egg  
autonomous cortical activity controlled  
by cytoplasmic clock: WAKSMUNDZKA,  
KRYSIK, KARASIEWICZ, CZOŁOWSKA &  
TARKOWSKI 77  
embryo  
cleavage, DNA replication and gene ex-  
pression: BOLTON, OADES & JOHNSON  
139  
intercellular couplings in preimplanta-  
tion stages: GOODALL & JOHNSON 53
- Nervous system**  
normal and abnormal development of an  
identified leech neurons: KUWADA 125
- Neuron**  
identified in leech nervous system:  
KUWADA 125
- Neuron development**  
in leech longitudinal muscles: KUWADA  
125
- Papilla cells**  
aggregative behaviour *in vivo* and *in vitro*  
culture: JAHODA & OLIVER 211
- Parthenogenetic activity**  
in mouse egg cortex: WAKSMUNDZKA,  
KRYSIK, KARASIEWICZ, CZOŁOWSKA &  
TARKOWSKI 77

**Pattern formation**

in axolotl limb blastema: HOLDER & REYNOLDS 165

in axolotl skin gland spacing: HOLDER & GLADE 97

in chick segmental plate: CHENEY & LASH 1

**Polyadenylation**

and transcription in early quail embryo: OLSZAŃSKA, KLUDKIEWICZ & LASSOTA 11

**Preprogramming**

in control of somite segmentation in chick gastrula: BELLAIRS & VEINI 183

**Rat**

dermal papillae

aggregative behaviour *in vivo* and *in vitro*: JAHODA & OLIVER 211

foetus and adult

asialoglycoprotein receptors on isolated hepatocytes: CONTI DE VIRGILIIS, DINI & RUSSO-CAIA 41

**Replication**

of DNA in mouse embryos: BOLTON, OADES & JOHNSON 139

**Ribonucleic acid (RNA)**

during early development of quail embryo—mRNA and tRNA: OLSZAŃSKA, KLUDKIEWICZ & LASSOTA 11

**Segmentation**

control in gastrula stages of the chick embryo: BELLAIRS & VEINI 183

**Segmental plate**

of chick—increase in cell-cell adhesion results in meristic pattern: CHENEY & LASH 1

**Skin glands**

in axolotl—formation of spacing pattern: HOLDER & GLADE 97

**Somite**

differentiation of connective tissue in chick: SWALLA & SOLURSH 243

segmentation in chick gastrula: BELLAIRS & VEINI 183

**Somitogenesis**

in chick embryo segmental plate: CHENEY & LASH 1

**Spacing pattern**

in axolotl skin glands: HOLDER & GLADE 97

**Transcription**

and polyadenylation processes in quail embryos: OLSZAŃSKA, KLUDKIEWICZ & LASSOTA 11

**Transfilter tissue recombinations**

study of epithelial induction of osteogenesis in chick embryo mandible: VAN EXAN & HALL 225

**Vibrissa**

dermal papilla cell aggregative behaviour *in vivo* and *in vitro*: JAHODA & OLIVER 211

**Vitamin A**

effect on pattern formation in axolotl blastema: HOLDER & REYNOLDS 165
